# Supplementary material for: Impaired Sensitivity to Thyroid Hormones Is Associated With the Change of Abdominal Fat in Euthyroid Type 2 Diabetes Patients: A Retrospective Cohort Study
Source: Hindawi journal article supplement (doi:10.1155/2024/8462987), 2024-01-01
Supplement: f1 [file 8462987.f1.pdf]

1140 T2DM participants were initially recruited

Excluded (n= 131):  
Acute complication of diabetes (n=64)  
Diagnosed with severe heart, kidney, or liver disease (n=59)  
Presence of a malignant tumor (n=8)

1009 T2DM participants enrolled in

Excluded (n= 88 ):  
Hashimotos thyroiditis (n=40)  
Hyperthyroidism (n=21)  
History of thyroid surgery (n=13)  
Subacute thyroiditis (n=8)  
Thyroid dysfunction (n=6)

921 participants with T2DM were finally enrolled in this study
