# Supplementary material for: Impaired Sensitivity to Thyroid Hormones Is Associated With the Change of Abdominal Fat in Euthyroid Type 2 Diabetes Patients: A Retrospective Cohort Study
Source: Hindawi journal article supplement (doi:10.1155/2024/8462987), 2024-01-01

A

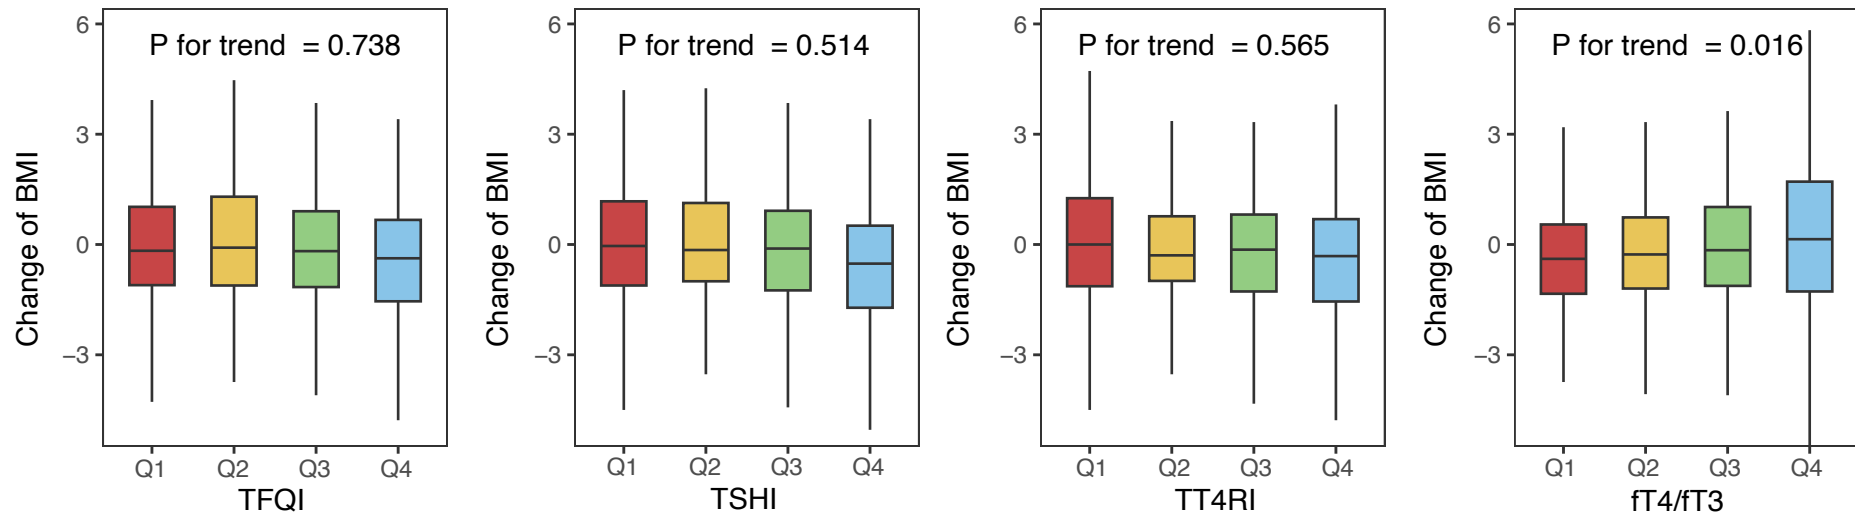

B

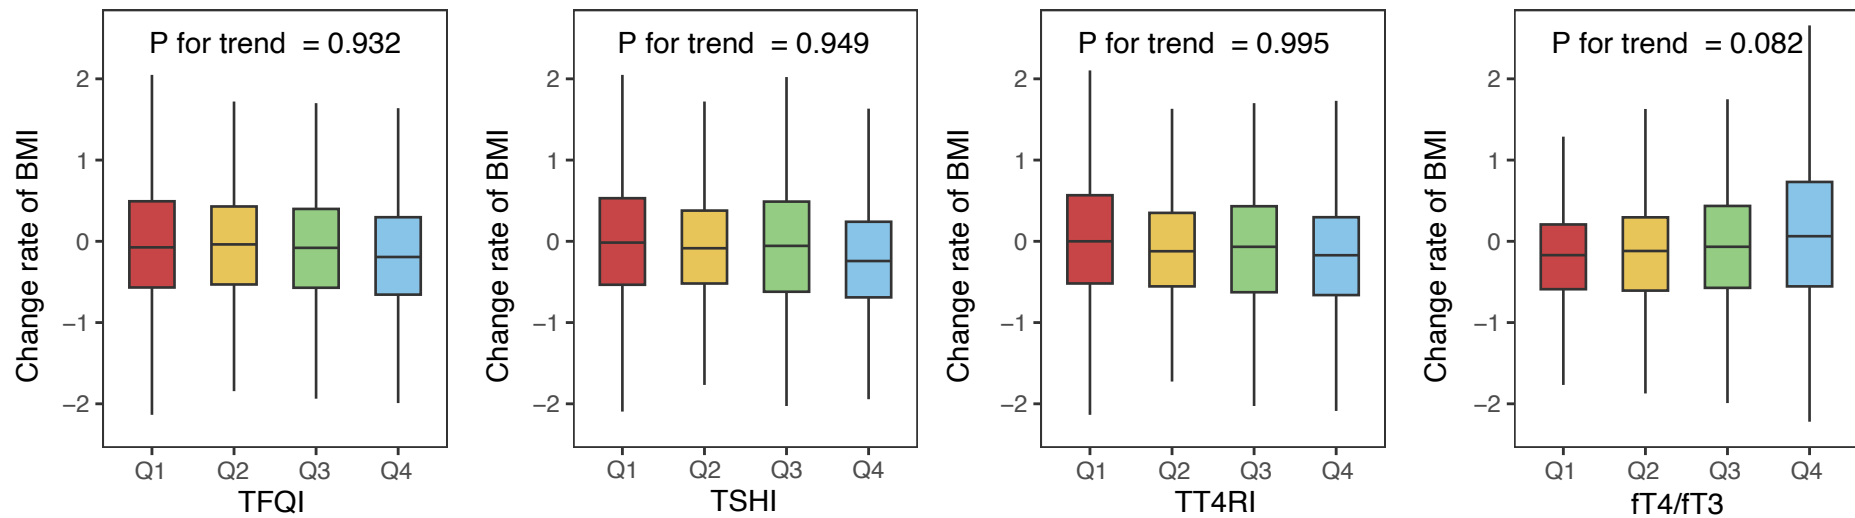

Supplement: f2 [file 8462987.f2.pdf]
